# Supplementary material for: The Oscillatory Profile Induced by the Anxiogenic Drug FG-7142 in the Amygdala–Hippocampal Network Is Reversed by Infralimbic Deep Brain Stimulation: Relevance for Mood Disorders
Source: MDPI journal article supplement (doi:10.3390/biomedicines9070783), 2021-07-06
Supplement: s1 [file s1]

**Table S1.** Penetration coordinates in the recording areas.

| Region | Anterioposterior | Lateral | Dorsoventral |
|--------|------------------|---------|--------------|
| dHPC   | -3.4 mm          | 2.5 mm  | 2.4 mm       |
| iHPC   | -5.8 mm          | 5.8 mm  | 5 mm         |
| vHPC   | -4.7 mm          | 5 mm    | 8.7 mm       |
| BLA    | -2.3 mm          | 5 mm    | 8.5 mm       |

  

| Rat # | Region | Penetration angle | Rat # | Region | Penetration angle | Rat # | Region | Penetration angle |
|-------|--------|-------------------|-------|--------|-------------------|-------|--------|-------------------|
| 1     | dHPC   | 0°                | 9     | dHPC   | 0°                | 17    | dHPC   | 0°                |
|       | iHPC   | 0°                |       | iHPC   | 0°                |       | iHPC   | 0°                |
|       | vHPC   | 10° from midline  |       | vHPC   | 0°                |       | vHPC   | 0°                |
|       | BLA    | 0°                |       | BLA    | 10° from midline  |       | BLA    | 10° from front    |
| 2     | dHPC   | 0°                | 10    | dHPC   | 0°                | 18    | dHPC   | 0°                |
|       | iHPC   | 10° from midline  |       | iHPC   | 0°                |       | iHPC   | 10° from midline  |
|       | vHPC   | 0°                |       | vHPC   | 10° from midline  |       | vHPC   | 0°                |
|       | BLA    | 0°                |       | BLA    | 0°                |       | BLA    | 0°                |
| 3     | dHPC   | 0°                | 11    | dHPC   | 0°                | 19    | dHPC   | 30° from lateral  |
|       | iHPC   | 0°                |       | iHPC   | 10° from midline  |       | iHPC   | 0°                |
|       | vHPC   | 0°                |       | vHPC   | 0°                |       | vHPC   | 0°                |
|       | BLA    | 10° from midline  |       | BLA    | 0°                |       | BLA    | 0°                |
| 4     | dHPC   | 10° from midline  | 12    | dHPC   | 10° from midline  | 20    | dHPC   | 0°                |
|       | iHPC   | 0°                |       | iHPC   | 0°                |       | iHPC   | 10 from midline   |
|       | vHPC   | 0°                |       | vHPC   | 0°                |       | vHPC   | 0°                |
|       | BLA    | 0°                |       | BLA    | 0°                |       | BLA    | 0°                |
| 5     | dHPC   | 0°                | 13    | dHPC   | 0°                | 21    | dHPC   | 0°                |
|       | iHPC   | 0°                |       | iHPC   | 0°                |       | iHPC   | 0°                |
|       | vHPC   | 0°                |       | vHPC   | 0°                |       | vHPC   | 0°                |
|       | BLA    | 20° from midline  |       | BLA    | 0°                |       | BLA    | 10° from front    |
| 6     | dHPC   | 0°                | 14    | dHPC   | 10° lateral       | 22    | dHPC   | 10° from midline  |
|       | iHPC   | 0°                |       | iHPC   | 0°                |       | iHPC   | 0°                |
|       | vHPC   | 20° from midline  |       | vHPC   | 0°                |       | vHPC   | 0°                |
|       | BLA    | 0°                |       | BLA    | 0°                |       | BLA    | 0°                |
| 7     | dHPC   | 0°                | 15    | dHPC   | 0°                | 23    | dHPC   | 0°                |
|       | iHPC   | 20° from midline  |       | iHPC   | 10° from behind   |       | iHPC   | 0°                |
|       | vHPC   | 0°                |       | vHPC   | 0°                |       | vHPC   | 10° from midline  |
|       | BLA    | 0°                |       | BLA    | 0°                |       | BLA    | 0°                |
| 8     | dHPC   | 20° from midline  | 16    | dHPC   | 0°                | 24    | dHPC   | 0°                |
|       | iHPC   | 0°                |       | iHPC   | 0°                |       | iHPC   | 0°                |
|       | vHPC   | 0°                |       | vHPC   | 10° from midline  |       | vHPC   | 0°                |
|       | BLA    | 0°                |       | BLA    | 0°                |       | BLA    | 10° from midline  |
