# Supplementary material for: The Oscillatory Profile Induced by the Anxiogenic Drug FG-7142 in the Amygdala–Hippocampal Network Is Reversed by Infralimbic Deep Brain Stimulation: Relevance for Mood Disorders
Source: MDPI journal article supplement (doi:10.3390/biomedicines9070783), 2021-07-06
Supplement: s1 [file s1]

Table S3. Analysis of theta segments parameters by wavelet analysis

| Parameter      | Region | Basal           | Saline          | FG-7142                   | DBS1                      | DBS2                      | DBS3                      | DBS4                      | DBS5                      | POST-DBS                |
|----------------|--------|-----------------|-----------------|---------------------------|---------------------------|---------------------------|---------------------------|---------------------------|---------------------------|-------------------------|
| Temporal Ratio | dHPC   | 0.0913 ± 0.0070 | 0.0904 ± 0.0073 | <b>0.6709 ± 0.0507***</b> | <b>0.5963 ± 0.0501***</b> | <b>0.5491 ± 0.0511***</b> | <b>0.4339 ± 0.0304***</b> | <b>0.2987 ± 0.0356***</b> | <b>0.1439 ± 0.0126***</b> | <b>0.1170 ± 0.0127*</b> |
|                | iHPC   | 0.2061 ± 0.0289 | 0.2309 ± 0.0352 | <b>0.5417 ± 0.0370***</b> | <b>0.5730 ± 0.0247***</b> | <b>0.5283 ± 0.0335***</b> | <b>0.5039 ± 0.0383***</b> | <b>0.3743 ± 0.0340***</b> | 0.2061 ± 0.0175           | 0.2135 ± 0.0206         |
|                | vHPC   | 0.1473 ± 0.0119 | 0.1353 ± 0.0158 | <b>0.5433 ± 0.0447***</b> | <b>0.6053 ± 0.0412***</b> | <b>0.5847 ± 0.0409***</b> | <b>0.3840 ± 0.0382***</b> | <b>0.3467 ± 0.0422***</b> | 0.1527 ± 0.0130           | 0.1423 ± 0.0153         |
|                | BLA    | 0.1230 ± 0.0127 | 0.1174 ± 0.0120 | <b>0.3357 ± 0.0289***</b> | <b>0.2961 ± 0.0286***</b> | <b>0.2800 ± 0.0186***</b> | <b>0.2435 ± 0.0137***</b> | <b>0.1904 ± 0.0182***</b> | 0.1461 ± 0.0115           | 0.1287 ± 0.0100         |
| Mean Width     | dHPC   | 0.7109 ± 0.0552 | 0.8070 ± 0.0837 | <b>3.1604 ± 0.2137***</b> | <b>2.7522 ± 0.2710***</b> | <b>2.8117 ± 0.1298***</b> | <b>2.4991 ± 0.2755***</b> | <b>1.4204 ± 0.2609***</b> | <b>1.0287 ± 0.1696**</b>  | 0.7887 ± 0.0996         |
|                | iHPC   | 0.7745 ± 0.0824 | 0.8248 ± 0.1043 | <b>2.5422 ± 0.2227***</b> | <b>2.4791 ± 0.1841***</b> | <b>2.1570 ± 0.1357***</b> | <b>1.4822 ± 0.1438***</b> | <b>1.3427 ± 0.1690***</b> | <b>1.0764 ± 0.1580*</b>   | <b>0.9736 ± 0.1217*</b> |
|                | vHPC   | 0.6340 ± 0.0297 | 0.6373 ± 0.0274 | <b>1.1180 ± 0.0564***</b> | <b>1.2180 ± 0.0887***</b> | <b>1.0013 ± 0.0502***</b> | <b>0.9747 ± 0.0762***</b> | 0.7480 ± 0.0373           | <b>0.7900 ± 0.0556*</b>   | 0.7060 ± 0.0605         |
|                | BLA    | 0.6096 ± 0.0544 | 0.5552 ± 0.0528 | <b>1.1183 ± 0.0762***</b> | <b>1.1059 ± 0.0770***</b> | <b>0.8362 ± 0.0473***</b> | <b>0.8565 ± 0.0506***</b> | <b>0.7670 ± 0.0808***</b> | 0.6257 ± 0.0538           | 0.6200 ± 0.0567         |
| Segments       | dHPC   | 9.897 ± 0.696   | 9.636 ± 0.696   | <b>15.530 ± 0.892***</b>  | <b>15.470 ± 0.527***</b>  | <b>14.617 ± 0.608***</b>  | <b>21.487 ± 1.067***</b>  | <b>10.939 ± 0.643**</b>   | <b>10.565 ± 0.686*</b>    | 9.929 ± 0.736           |
|                | iHPC   | 15.826 ± 1.428  | 14.826 ± 0.790  | <b>19.574 ± 0.866***</b>  | <b>21.835 ± 0.938***</b>  | <b>18.614 ± 0.961**</b>   | <b>18.522 ± 0.954*</b>    | <b>18.609 ± 1.986*</b>    | 15.017 ± 0.699            | <b>15.087 ± 0.857*</b>  |
|                | vHPC   | 11.427 ± 1.019  | 10.907 ± 1.217  | <b>17.483 ± 0.0911***</b> | <b>18.920 ± 1.771***</b>  | <b>24.707 ± 2.103***</b>  | <b>24.000 ± 1.696***</b>  | <b>14.600 ± 0.907†</b>    | <b>14.667 ± 1.1183*</b>   | 13.960 ± 0.890          |
|                | BLA    | 14.435 ± 1.323  | 13.443 ± 1.036  | <b>28.130 ± 0.1529***</b> | <b>30.417 ± 1.657***</b>  | <b>29.139 ± 2.500***</b>  | <b>26.930 ± 1.645***</b>  | <b>18.974 ± 1.071†</b>    | <b>19.530 ± 1.406***</b>  | 17.470 ± 1.409          |

Note: Mean ± se (bold: statistical significance in pairwise comparisons to basal period; \*\*\*p< 0.001, \*\*p< 0.01; \*p< 0.05; †: 0.08<p<0.05)
