# Supplementary material for: The Oscillatory Profile Induced by the Anxiogenic Drug FG-7142 in the Amygdala–Hippocampal Network Is Reversed by Infralimbic Deep Brain Stimulation: Relevance for Mood Disorders
Source: MDPI journal article supplement (doi:10.3390/biomedicines9070783), 2021-07-06
Supplement: s1 [file s1]

Table S4. Gamma power.

| Band       |      | Basal         | Saline        | FG-7142                 | DBS1                    | DBS2                    | DBS3                    | DBS4                    | DBS5                    | POST-DBS                |
|------------|------|---------------|---------------|-------------------------|-------------------------|-------------------------|-------------------------|-------------------------|-------------------------|-------------------------|
| Low Gamma  | dHPC | 1.205 ± 0.024 | 1.196 ± 0.033 | 1.236 ± 0.026           | <b>1.590 ± 0.040***</b> | <b>1.679 ± 0.066***</b> | <b>1.684 ± 0.059***</b> | <b>1.723 ± 0.064***</b> | <b>1.651 ± 0.065***</b> | <b>1.521 ± 0.056***</b> |
|            | iHPC | 2.208 ± 0.084 | 2.258 ± 0.080 | 2.570 ± 0.097           | <b>2.752 ± 0.100***</b> | <b>2.780 ± 0.098***</b> | <b>2.848 ± 0.101***</b> | <b>2.939 ± 0.129***</b> | <b>2.747 ± 0.078***</b> | <b>2.596 ± 0.078***</b> |
|            | vHPC | 1.641 ± 0.060 | 1.609 ± 0.061 | 1.620 ± 0.055           | <b>2.007 ± 0.081***</b> | <b>1.991 ± 0.095***</b> | <b>1.989 ± 0.084***</b> | <b>2.040 ± 0.081***</b> | <b>2.000 ± 0.093***</b> | <b>2.114 ± 0.081***</b> |
|            | BLA  | 1.332 ± 0.041 | 1.319 ± 0.047 | 1.357 ± 0.056           | <b>1.700 ± 0.074***</b> | <b>1.761 ± 0.073***</b> | <b>1.753 ± 0.065***</b> | <b>1.732 ± 0.068***</b> | <b>1.771 ± 0.059***</b> | <b>1.719 ± 0.071***</b> |
| Mid Gamma  | dHPC | 0.744 ± 0.047 | 0.737 ± 0.047 | 0.741 ± 0.041           | <b>1.247 ± 0.052***</b> | <b>1.298 ± 0.045***</b> | <b>1.340 ± 0.064***</b> | <b>1.341 ± 0.064***</b> | <b>1.338 ± 0.060***</b> | <b>1.240 ± 0.072***</b> |
|            | iHPC | 1.747 ± 0.075 | 1.768 ± 0.072 | 1.772 ± 0.073           | 1.737 ± 0.076           | 1.695 ± 0.073           | 1.698 ± 0.081           | 1.724 ± 0.080           | 1.712 ± 0.075           | 1.694 ± 0.080           |
|            | vHPC | 0.801 ± 0.046 | 0.822 ± 0.052 | <b>0.861 ± 0.050***</b> | <b>1.494 ± 0.087***</b> | <b>1.525 ± 0.089***</b> | <b>1.501 ± 0.070***</b> | <b>1.515 ± 0.070***</b> | <b>1.456 ± 0.077***</b> | <b>1.416 ± 0.077***</b> |
|            | BLA  | 0.662 ± 0.048 | 0.676 ± 0.049 | <b>0.822 ± 0.060***</b> | <b>1.079 ± 0.064***</b> | <b>0.976 ± 0.056***</b> | <b>1.084 ± 0.070***</b> | <b>1.054 ± 0.070***</b> | <b>1.088 ± 0.067***</b> | <b>1.082 ± 0.073***</b> |
| High Gamma | dHPC | 0.598 ± 0.034 | 0.611 ± 0.033 | 0.596 ± 0.036           | <b>0.881 ± 0.075***</b> | <b>0.843 ± 0.093***</b> | <b>0.732 ± 0.049***</b> | <b>0.801 ± 0.071***</b> | <b>0.830 ± 0.082***</b> | <b>0.711 ± 0.052***</b> |
|            | iHPC | 1.011 ± 0.066 | 1.039 ± 0.066 | 1.002 ± 0.078           | <b>1.308 ± 0.078***</b> | <b>1.252 ± 0.070***</b> | <b>1.255 ± 0.074***</b> | <b>1.287 ± 0.063***</b> | <b>1.215 ± 0.080***</b> | <b>1.145 ± 0.078***</b> |
|            | vHPC | 0.523 ± 0.055 | 0.553 ± 0.043 | <b>0.803 ± 0.052***</b> | <b>1.103 ± 0.089***</b> | <b>1.145 ± 0.085***</b> | <b>1.140 ± 0.071***</b> | <b>1.104 ± 0.068***</b> | <b>1.103 ± 0.059***</b> | <b>1.131 ± 0.068***</b> |
|            | BLA  | 0.576 ± 0.053 | 0.583 ± 0.053 | 0.554 ± 0.058           | <b>1.019 ± 0.052***</b> | <b>0.813 ± 0.034***</b> | <b>0.974 ± 0.054***</b> | <b>0.906 ± 0.056***</b> | <b>0.943 ± 0.054***</b> | <b>0.790 ± 0.052***</b> |

Note: Mean ± se (bold: statistical significance in pairwise comparisons to basal period \*\*\* p<0.001)
