# Supplementary material for: The Oscillatory Profile Induced by the Anxiogenic Drug FG-7142 in the Amygdala–Hippocampal Network Is Reversed by Infralimbic Deep Brain Stimulation: Relevance for Mood Disorders
Source: MDPI journal article supplement (doi:10.3390/biomedicines9070783), 2021-07-06
Supplement: s1 [file s1]

Table S6. Phase-amplitude coupling (measured as modulation index).

| Bands                   | Region | Basal             | Saline            | FG-7142                     | DBS1                                  | DBS2                        | DBS3                        | DBS4                        | DBS5                        | POST-DBS                    |
|-------------------------|--------|-------------------|-------------------|-----------------------------|---------------------------------------|-----------------------------|-----------------------------|-----------------------------|-----------------------------|-----------------------------|
| Delta-Beta              | dHPC   | 0.0012 ± 0.0001   | 0.0011 ± 0.0001   | 0.0011 ± 0.0001             | <b>0.0028 ± 0.0002***</b>             | <b>0.0022 ± 0.0002***</b>   | <b>0.0022 ± 0.0002***</b>   | <b>0.0022 ± 0.0002***</b>   | <b>0.0021 ± 0.0002***</b>   | <b>0.0024 ± 0.0002***</b>   |
|                         | iHPC   | 0.0032 ± 0.0003   | 0.0028 ± 0.0001   | <b>0.0076 ± 0.0009***</b>   | <b>0.0041 ± 0.0003***</b>             | <b>0.0044 ± 0.0004***</b>   | 0.0034 ± 0.0003             | 0.0031 ± 0.0003             | 0.0035 ± 0.0004             | 0.0032 ± 0.0003             |
|                         | vHPC   | 0.0013 ± 0.0001   | 0.0013 ± 0.0002   | <b>0.0035 ± 0.0003***</b>   | <b>0.0037 ± 0.0004***</b>             | <b>0.0025 ± 0.0004***</b>   | <b>0.0020 ± 0.0002***</b>   | <b>0.0027 ± 0.0002***</b>   | <b>0.0021 ± 0.0002***</b>   | <b>0.0016 ± 0.0002*</b>     |
|                         | BLA    | 0.0028 ± 0.0002   | 0.0027 ± 0.0003   | <b>0.0043 ± 0.0003***</b>   | 0.0031 ± 0.0002                       | 0.0024 ± 0.0002             | <b>0.0023 ± 0.0002*</b>     | <b>0.0020 ± 0.0002***</b>   | <b>0.0022 ± 0.0003***</b>   | <b>0.0021 ± 0.0002***</b>   |
| Slow Waves–Low Theta    | dHPC   | 0.0122 ± 0.0010   | 0.0117 ± 0.0013   | <b>0.0185 ± 0.0010***</b>   | <b>0.0270 ± 0.0023***</b>             | <b>0.0188 ± 0.0020***</b>   | <b>0.0204 ± 0.0021***</b>   | <b>0.0228 ± 0.0018***</b>   | 0.0123 ± 0.0015             | 0.0114 ± 0.0006             |
|                         | iHPC   | 0.0231 ± 0.0012   | 0.0230 ± 0.0018   | <b>0.0317 ± 0.0029***</b>   | <b>0.0295 ± 0.0023***</b>             | 0.0263 ± 0.0020             | 0.0256 ± 0.0022             | <b>0.0305 ± 0.0031**</b>    | <b>0.0194 ± 0.0012**</b>    | <b>0.0193 ± 0.0018*</b>     |
|                         | vHPC   | 0.0092 ± 0.0008   | 0.0084 ± 0.0009   | <b>0.0186 ± 0.0015***</b>   | <b>0.0168 ± 0.0026***</b>             | <b>0.0159 ± 0.0018***</b>   | <b>0.0138 ± 0.0013*</b>     | <b>0.0149 ± 0.0015**</b>    | 0.0092 ± 0.0010             | 0.0104 ± 0.0008             |
|                         | BLA    | 0.0108 ± 0.0009   | 0.0114 ± 0.0009   | <b>0.0195 ± 0.0018***</b>   | <b>0.0180 ± 0.0016***</b>             | 0.0137 ± 0.0022             | <b>0.0190 ± 0.0010***</b>   | 0.0098 ± 0.0010             | 0.0108 ± 0.0013             | 0.0108 ± 0.0009             |
| Slow Waves – Low Gamma  | dHPC   | 0.0013 ± 0.0002   | 0.0012 ± 0.0002   | 0.0011 ± 0.0002             | <b>0.0035 ± 0.0004***</b>             | <b>0.0016 ± 0.0001*</b>     | <b>0.0023 ± 0.0001***</b>   | <b>0.0024 ± 0.0002***</b>   | <b>0.0026 ± 0.0002***</b>   | <b>0.0027 ± 0.0002***</b>   |
|                         | iHPC   | 0.0039 ± 0.0002   | 0.0038 ± 0.0003   | 0.0039 ± 0.0004             | <b>0.0066 ± 0.0005***</b>             | <b>0.0056 ± 0.0004***</b>   | <b>0.0058 ± 0.0005***</b>   | <b>0.0056 ± 0.0005***</b>   | <b>0.0066 ± 0.0005***</b>   | <b>0.0062 ± 0.0005***</b>   |
|                         | vHPC   | 0.0014 ± 0.0001   | 0.0014 ± 0.0002   | 0.0016 ± 0.0002             | <b>0.0034 ± 0.0003***</b>             | <b>0.0044 ± 0.0004***</b>   | <b>0.0032 ± 0.0003***</b>   | <b>0.0026 ± 0.0004***</b>   | <b>0.0028 ± 0.0004**</b>    | <b>0.0029 ± 0.0004***</b>   |
|                         | BLA    | 0.0012 ± 0.0001   | 0.0012 ± 0.0001   | 0.0011 ± 0.0001             | <b>0.0035 ± 0.0002***</b>             | <b>0.0025 ± 0.0004***</b>   | <b>0.0024 ± 0.0003***</b>   | <b>0.0024 ± 0.0003***</b>   | <b>0.0022 ± 0.0002***</b>   | <b>0.0036 ± 0.0003***</b>   |
| Slow Waves – Mid Gamma  | dHPC   | 0.00049 ± 0.00003 | 0.00048 ± 0.00003 | 0.00049 ± 0.00004           | <b>0.00124 ± 0.00010**</b>            | <b>0.00084 ± 0.00007**</b>  | <b>0.00082 ± 0.00006**</b>  | <b>0.00089 ± 0.00009**</b>  | <b>0.00084 ± 0.00007**</b>  | <b>0.00084 ± 0.00006**</b>  |
|                         | iHPC   | 0.00095 ± 0.00007 | 0.00097 ± 0.00006 | 0.00097 ± 0.00005           | <b>0.00149 ± 0.00011**</b>            | <b>0.00127 ± 0.00012**</b>  | <b>0.00129 ± 0.00016**</b>  | <b>0.00119 ± 0.00011**</b>  | <b>0.00125 ± 0.00012**</b>  | <b>0.00118 ± 0.00011**</b>  |
|                         | vHPC   | 0.00079 ± 0.00007 | 0.00079 ± 0.00005 | 0.00076 ± 0.00006           | <b>0.00137 ± 0.00016**</b>            | <b>0.00110 ± 0.00011**</b>  | 0.00091 ± 0.00006           | <b>0.00107 ± 0.00012*</b>   | 0.00087 ± 0.00006           | <b>0.00117 ± 0.00006**</b>  |
|                         | BLA    | 0.00057 ± 0.00004 | 0.00061 ± 0.00005 | 0.00060 ± 0.00005           | <b>0.00094 ± 0.00007**</b>            | <b>0.00069 ± 0.00006*</b>   | <b>0.00085 ± 0.00006**</b>  | <b>0.00083 ± 0.00006**</b>  | <b>0.00086 ± 0.00005**</b>  | <b>0.00083 ± 0.00004**</b>  |
| Slow Waves – High Gamma | dHPC   | 0.00043 ± 0.00003 | 0.00038 ± 0.00002 | 0.00038 ± 0.00003           | <b>0.00062 ± 0.00006**</b>            | 0.00052 ± 0.00008           | 0.00047 ± 0.00002           | <b>0.00058 ± 0.00007*</b>   | <b>0.00057 ± 0.00004*</b>   | <b>0.00068 ± 0.00007**</b>  |
|                         | iHPC   | 0.00068 ± 0.00007 | 0.00076 ± 0.00006 | 0.00078 ± 0.00009           | <b>0.00137 ± 0.00012**</b>            | <b>0.00106 ± 0.00012**</b>  | <b>0.00100 ± 0.00013**</b>  | <b>0.00096 ± 0.00013**</b>  | <b>0.00095 ± 0.00009***</b> | <b>0.00093 ± 0.00009***</b> |
|                         | vHPC   | 0.00040 ± 0.00004 | 0.00041 ± 0.00005 | 0.00041 ± 0.00005           | <b>0.00145 ± 0.00011**</b>            | <b>0.00069 ± 0.00008***</b> | <b>0.00093 ± 0.00010***</b> | <b>0.00091 ± 0.00008***</b> | <b>0.00077 ± 0.00008***</b> | <b>0.00113 ± 0.00012***</b> |
|                         | BLA    | 0.00031 ± 0.00003 | 0.00033 ± 0.00003 | 0.00032 ± 0.00003           | <b>0.00091 ± 0.00008***</b>           | <b>0.00046 ± 0.00004***</b> | <b>0.00047 ± 0.00005**</b>  | <b>0.00046 ± 0.00006**</b>  | <b>0.00050 ± 0.00006***</b> | <b>0.00063 ± 0.00008***</b> |
| Low Theta – Low Gamma   | dHPC   | 0.0004 ± 0.0000   | 0.0004 ± 0.0000   | 0.0004 ± 0.0000             | <b>0.0018 ± 0.0002***</b>             | <b>0.0017 ± 0.0003***</b>   | <b>0.0010 ± 0.0001***</b>   | <b>0.0010 ± 0.0001***</b>   | <b>0.0010 ± 0.0001***</b>   | <b>0.0012 ± 0.0001***</b>   |
|                         | iHPC   | 0.0012 ± 0.0001   | 0.0012 ± 0.0001   | <b>0.0016 ± 0.0001***</b>   | <b>0.0025 ± 0.0002***</b>             | <b>0.0023 ± 0.0002***</b>   | <b>0.0035 ± 0.0002***</b>   | <b>0.0025 ± 0.0002***</b>   | <b>0.0032 ± 0.0003***</b>   | <b>0.0032 ± 0.0002***</b>   |
|                         | vHPC   | 0.0007 ± 0.0001   | 0.0007 ± 0.0002   | 0.0008 ± 0.0002             | <b>0.0020 ± 0.0002***</b>             | <b>0.0015 ± 0.0002***</b>   | <b>0.0017 ± 0.0002***</b>   | <b>0.0013 ± 0.0001**</b>    | <b>0.0014 ± 0.0002***</b>   | <b>0.0015 ± 0.0002***</b>   |
|                         | BLA    | 0.0004 ± 0.0001   | 0.0004 ± 0.0000   | 0.0004 ± 0.0000             | <b>0.0017 ± 0.0002***</b>             | <b>0.0011 ± 0.0001***</b>   | <b>0.0009 ± 0.0001***</b>   | <b>0.0008 ± 0.0001***</b>   | <b>0.0011 ± 0.0001***</b>   | <b>0.0012 ± 0.0001***</b>   |
| Mid Theta – Low Gamma   | dHPC   | 0.00027 ± 0.00004 | 0.00021 ± 0.00002 | <b>0.00036 ± 0.00002***</b> | <b>0.00078 ± 0.00007**</b>            | <b>0.00046 ± 0.00007**</b>  | <b>0.00032 ± 0.00002*</b>   | <b>0.00033 ± 0.00003*</b>   | <b>0.00030 ± 0.00002*</b>   | 0.00032 ± 0.00004           |
|                         | iHPC   | 0.00051 ± 0.00004 | 0.00048 ± 0.00003 | <b>0.00042 ± 0.00005**</b>  | <b>0.00072 ± 0.00005***</b>           | 0.00062 ± 0.00007           | 0.00047 ± 0.00006           | <b>0.00041 ± 0.00005***</b> | 0.00047 ± 0.00005           | <b>0.00032 ± 0.00005***</b> |
|                         | vHPC   | 0.00028 ± 0.00004 | 0.00032 ± 0.00006 | 0.00031 ± 0.00005           | <b>0.00099 ± 0.00010***</b>           | <b>0.00096 ± 0.00010***</b> | <b>0.00080 ± 0.00012***</b> | <b>0.00067 ± 0.00012***</b> | <b>0.00048 ± 0.00009*</b>   | <b>0.00057 ± 0.00008***</b> |
|                         | BLA    | 0.00021 ± 0.00003 | 0.00023 ± 0.00003 | 0.00023 ± 0.00004           | <b>0.00037 ± 4*10<sup>-5</sup>***</b> | 0.00023 ± 0.00003           | <b>0.00028 ± 0.00004*</b>   | 0.00029 ± 0.00004           | 0.00026 ± 0.00003           | 0.00023 ± 0.00003           |
| High Theta – Low Gamma  | dHPC   | 0.00020 ± 0.00003 | 0.00020 ± 0.00003 | <b>0.00034 ± 0.00002***</b> | <b>0.00034 ± 0.00003***</b>           | 0.00020 ± 0.00005           | 0.00019 ± 0.00001           | <b>0.00013 ± 0.00003*</b>   | <b>0.00011 ± 0.00001***</b> | 0.00014 ± 0.00002           |
|                         | iHPC   | 0.00031 ± 0.00005 | 0.00028 ± 0.00002 | <b>0.00096 ± 0.00006***</b> | <b>0.00066 ± 0.00006***</b>           | 0.00027 ± 0.00003           | 0.00032 ± 0.00004           | 0.00031 ± 0.00005           | 0.00030 ± 0.00004           | 0.00031 ± 0.00004           |
|                         | vHPC   | 0.00017 ± 0.00002 | 0.00017 ± 0.00002 | 0.00021 ± 0.00004           | <b>0.00095 ± 0.00008***</b>           | 0.00020 ± 0.00002           | 0.00020 ± 0.00003           | 0.00020 ± 0.00003           | 0.00022 ± 0.00004           | 0.00023 ± 0.00001           |
|                         | BLA    | 0.00020 ± 0.00003 | 0.00018 ± 0.00003 | 0.00016 ± 0.00003           | <b>0.00075 ± 0.00007***</b>           | <b>0.00014 ± 0.00002†</b>   | 0.00015 ± 0.00002           | 0.00019 ± 0.00002           | 0.00018 ± 0.00002           | 0.00023 ± 0.00006           |

Note: Mean ± se (bold: statistical significance in pairwise comparisons to basal period; \*\*\*p < 0.001, \*\*p < 0.01; \*p < 0.05; †: 0.08 < p < 0.05)
