# Supplementary material for: The Oscillatory Profile Induced by the Anxiogenic Drug FG-7142 in the Amygdala–Hippocampal Network Is Reversed by Infralimbic Deep Brain Stimulation: Relevance for Mood Disorders
Source: MDPI journal article supplement (doi:10.3390/biomedicines9070783), 2021-07-06
Supplement: s1 [file s1]

**Table S2.** Relative power computed by spectral decomposition.

| Band       | Region | Basal         | Saline         | FG-7142                 | DBS1                    | DBS2                    | DBS3                    | DBS4                    | DBS5                    | POST-DBS      |
|------------|--------|---------------|----------------|-------------------------|-------------------------|-------------------------|-------------------------|-------------------------|-------------------------|---------------|
| Slow Waves | dHPC   | 0.489 ± 0.040 | 0.492 ± 0.039  | <b>0.281 ± 0.033***</b> | <b>0.284 ± 0.038***</b> | <b>0.298 ± 0.039***</b> | <b>0.342 ± 0.045***</b> | 0.436 ± 0.045           | 0.450 ± 0.043           | 0.491 ± 0.038 |
|            | iHPC   | 0.380 ± 0.047 | 0.384 ± 0.046  | <b>0.217 ± 0.034***</b> | <b>0.212 ± 0.036***</b> | <b>0.215 ± 0.031***</b> | <b>0.262 ± 0.046***</b> | 0.351 ± 0.046           | 0.350 ± 0.045           | 0.397 ± 0.048 |
|            | vHPC   | 0.443 ± 0.061 | 0.424 ± 0.071  | <b>0.232 ± 0.048**</b>  | 0.270 ± 0.051           | <b>0.258 ± 0.044**</b>  | 0.392 ± 0.081           | 0.392 ± 0.072           | 0.315 ± 0.059           | 0.365 ± 0.058 |
|            | BLA    | 0.390 ± 0.044 | 0.398 ± 0.044  | <b>0.229 ± 0.038***</b> | <b>0.266 ± 0.046*</b>   | <b>0.256 ± 0.037*</b>   | 0.301 ± 0.045           | 0.351 ± 0.050           | 0.313 ± 0.042           | 0.379 ± 0.037 |
| Delta      | dHPC   | 0.158 ± 0.012 | 0.158 ± 0.010  | 0.160 ± 0.013           | 0.157 ± 0.015           | 0.164 ± 0.019           | 0.174 ± 0.024           | 0.163 ± 0.018           | 0.173 ± 0.014           | 0.170 ± 0.011 |
|            | iHPC   | 0.154 ± 0.006 | 0.146 ± 0.007  | <b>0.248 ± 0.009***</b> | 0.130 ± 0.018           | 0.169 ± 0.020           | 0.157 ± 0.023           | 0.140 ± 0.017           | 0.140 ± 0.014           | 0.141 ± 0.014 |
|            | vHPC   | 0.173 ± 0.008 | 0.183 ± 0.018  | <b>0.273 ± 0.031***</b> | 0.205 ± 0.037           | 0.198 ± 0.023           | 0.164 ± 0.031           | 0.148 ± 0.025           | 0.156 ± 0.026           | 0.196 ± 0.018 |
|            | BLA    | 0.202 ± 0.012 | 0.195 ± 0.015  | <b>0.311 ± 0.031**</b>  | 0.237 ± 0.035           | 0.210 ± 0.031           | <b>0.290 ± 0.025**</b>  | <b>0.179 ± 0.025***</b> | <b>0.183 ± 0.026**</b>  | 0.192 ± 0.013 |
| Low Theta  | dHPC   | 0.193 ± 0.020 | 0.188 ± 0.023  | <b>0.324 ± 0.031***</b> | <b>0.314 ± 0.033***</b> | <b>0.315 ± 0.034***</b> | <b>0.290 ± 0.033**</b>  | 0.214 ± 0.028           | 0.198 ± 0.023           | 0.190 ± 0.019 |
|            | iHPC   | 0.196 ± 0.023 | 0.189 ± 0.021  | <b>0.302 ± 0.033***</b> | <b>0.337 ± 0.036***</b> | <b>0.323 ± 0.040***</b> | <b>0.305 ± 0.043**</b>  | 0.223 ± 0.032           | 0.177 ± 0.018           | 0.171 ± 0.017 |
|            | vHPC   | 0.164 ± 0.017 | 0.153 ± 0.016  | <b>0.227 ± 0.025†</b>   | <b>0.224 ± 0.026*</b>   | <b>0.231 ± 0.027**</b>  | 0.171 ± 0.029           | 0.184 ± 0.023           | 0.149 ± 0.017           | 0.169 ± 0.006 |
|            | BLA    | 0.167 ± 0.016 | 0.154 ± 0.014  | <b>0.246 ± 0.026*</b>   | 0.233 ± 0.029           | 0.215 ± 0.032           | 0.206 ± 0.030           | 0.187 ± 0.024           | 0.168 ± 0.017           | 0.162 ± 0.013 |
| High Theta | dHPC   | 0.091 ± 0.011 | 0.082 ± 0.010  | <b>0.139 ± 0.010***</b> | 0.102 ± 0.009           | 0.097 ± 0.013           | 0.079 ± 0.009           | 0.084 ± 0.012           | 0.075 ± 0.010           | 0.076 ± 0.011 |
|            | iHPC   | 0.142 ± 0.030 | 0.159 ± 0.037  | <b>0.133 ± 0.010**</b>  | 0.124 ± 0.012           | 0.114 ± 0.012           | 0.116 ± 0.016           | 0.113 ± 0.014           | 0.108 ± 0.015           | 0.130 ± 0.020 |
|            | vHPC   | 0.127 ± 0.025 | 0.155 ± 0.037  | 0.148 ± 0.020           | 0.118 ± 0.019           | 0.132 ± 0.022           | 0.097 ± 0.023           | 0.098 ± 0.024           | 0.124 ± 0.023           | 0.118 ± 0.020 |
|            | BLA    | 0.163 ± 0.024 | 0.165 ± 0.027  | 0.157 ± 0.021           | 0.140 ± 0.020           | 0.134 ± 0.022           | <b>0.118 ± 0.019*</b>   | <b>0.112 ± 0.021*</b>   | <b>0.112 ± 0.018*</b>   | 0.130 ± 0.020 |
| Beta       | HPCD   | 0.020 ± 0.004 | 0.019 ± 0.0003 | 0.023 ± 0.004           | 0.022 ± 0.004           | 0.022 ± 0.004           | 0.020 ± 0.004           | 0.020 ± 0.004           | 0.021 ± 0.004           | 0.019 ± 0.004 |
|            | HPCI   | 0.033 ± 0.004 | 0.029 ± 0.0003 | <b>0.069 ± 0.010***</b> | <b>0.071 ± 0.014***</b> | <b>0.062 ± 0.014***</b> | <b>0.057 ± 0.012***</b> | <b>0.044 ± 0.003***</b> | 0.035 ± 0.003           | 0.035 ± 0.003 |
|            | HPCV   | 0.018 ± 0.002 | 0.021 ± 0.0001 | <b>0.072 ± 0.009***</b> | <b>0.053 ± 0.011***</b> | <b>0.053 ± 0.011***</b> | <b>0.045 ± 0.009***</b> | <b>0.042 ± 0.006***</b> | <b>0.037 ± 0.003***</b> | 0.028 ± 0.003 |
|            | BLA    | 0.026 ± 0.003 | 0.026 ± 0.0003 | <b>0.065 ± 0.006***</b> | <b>0.053 ± 0.005***</b> | <b>0.040 ± 0.006*</b>   | 0.040 ± 0.008           | 0.034 ± 0.007           | 0.030 ± 0.005           | 0.035 ± 0.003 |

Note: Mean ± se (bold: in pairwise comparisons to basal period; \*\*\*p< 0.001, \*\*p< 0.01, \*p< 0.05, †: 0.08<p<0.05)
