# Supplementary material for: The Oscillatory Profile Induced by the Anxiogenic Drug FG-7142 in the Amygdala–Hippocampal Network Is Reversed by Infralimbic Deep Brain Stimulation: Relevance for Mood Disorders
Source: MDPI journal article supplement (doi:10.3390/biomedicines9070783), 2021-07-06
Supplement: s1 [file s1]

Table S5. Phase Locking Value, measured as weighted phase lag index (WPLI).

| Band       | Channels  | Basal         | Saline        | FG-7142                 | DBS1                    | DBS2                    | DBS3                    | DBS4                    | DBS5                    | POST-DBS                |
|------------|-----------|---------------|---------------|-------------------------|-------------------------|-------------------------|-------------------------|-------------------------|-------------------------|-------------------------|
| Slow Waves | dHPC-iHPC | 0.890 ± 0.024 | 0.901 ± 0.018 | <b>0.260 ± 0.016***</b> | <b>0.398 ± 0.030***</b> | <b>0.645 ± 0.044***</b> | <b>0.673 ± 0.042***</b> | <b>0.669 ± 0.047***</b> | <b>0.710 ± 0.031***</b> | 0.888 ± 0.019           |
|            | dHPC-BLA  | 0.869 ± 0.024 | 0.865 ± 0.021 | <b>0.350 ± 0.037***</b> | <b>0.553 ± 0.041***</b> | <b>0.555 ± 0.036***</b> | <b>0.659 ± 0.047***</b> | <b>0.686 ± 0.037***</b> | <b>0.769 ± 0.020***</b> | 0.825 ± 0.035           |
|            | iHPC-BLA  | 0.896 ± 0.017 | 0.884 ± 0.033 | <b>0.253 ± 0.034***</b> | <b>0.470 ± 0.031***</b> | <b>0.459 ± 0.041***</b> | <b>0.714 ± 0.031***</b> | <b>0.834 ± 0.034***</b> | <b>0.774 ± 0.032***</b> | <b>0.861 ± 0.019†</b>   |
|            | vHPC-dHPC | 0.812 ± 0.034 | 0.801 ± 0.039 | <b>0.282 ± 0.033***</b> | <b>0.419 ± 0.034***</b> | <b>0.698 ± 0.063***</b> | <b>0.787 ± 0.044***</b> | <b>0.826 ± 0.042*</b>   | <b>0.779 ± 0.043***</b> | 0.869 ± 0.028           |
|            | vHPC-iHPC | 0.807 ± 0.039 | 0.813 ± 0.025 | <b>0.255 ± 0.039***</b> | <b>0.412 ± 0.047***</b> | <b>0.579 ± 0.051***</b> | 0.803 ± 0.039           | 0.795 ± 0.036           | <b>0.697 ± 0.037***</b> | 0.845 ± 0.028           |
|            | vHPC-BLA  | 0.884 ± 0.019 | 0.889 ± 0.026 | <b>0.371 ± 0.034***</b> | <b>0.749 ± 0.041*</b>   | <b>0.664 ± 0.048**</b>  | <b>0.747 ± 0.035†</b>   | 0.911 ± 0.025           | 0.854 ± 0.034           | 0.849 ± 0.035           |
| Delta      | dHPC-iHPC | 0.414 ± 0.031 | 0.383 ± 0.033 | 0.428 ± 0.033           | <b>0.532 ± 0.045†</b>   | <b>0.582 ± 0.048***</b> | 0.458 ± 0.046           | <b>0.556 ± 0.045***</b> | <b>0.720 ± 0.046***</b> | <b>0.540 ± 0.049***</b> |
|            | dHPC-BLA  | 0.583 ± 0.038 | 0.583 ± 0.044 | 0.652 ± 0.042           | 0.600 ± 0.048           | 0.596 ± 0.043           | <b>†0.510 ± 0.043</b>   | 0.607 ± 0.050           | 0.544 ± 0.054           | 0.497 ± 0.056           |
|            | iHPC-BLA  | 0.337 ± 0.026 | 0.318 ± 0.022 | <b>0.796 ± 0.029***</b> | <b>0.664 ± 0.046***</b> | <b>0.484 ± 0.052***</b> | 0.482 ± 0.048           | <b>0.493 ± 0.042***</b> | <b>0.425 ± 0.032***</b> | 0.328 ± 0.032           |
|            | vHPC-dHPC | 0.542 ± 0.068 | 0.527 ± 0.065 | <b>0.453 ± 0.081***</b> | <b>0.389 ± 0.080***</b> | 0.405 ± 0.066           | <b>0.455 ± 0.080**</b>  | <b>0.411 ± 0.087**</b>  | 0.532 ± 0.080           | 0.438 ± 0.088           |
|            | vHPC-iHPC | 0.325 ± 0.026 | 0.293 ± 0.037 | <b>0.780 ± 0.034***</b> | 0.483 ± 0.042           | <b>0.604 ± 0.054**</b>  | 0.345 ± 0.043           | 0.349 ± 0.041           | 0.316 ± 0.026           | 0.326 ± 0.022           |
|            | vHPC-BLA  | 0.367 ± 0.035 | 0.359 ± 0.051 | <b>0.811 ± 0.041***</b> | <b>†0.588 ± 0.067</b>   | <b>0.761 ± 0.045***</b> | <b>0.607 ± 0.066**</b>  | <b>0.705 ± 0.061***</b> | 0.497 ± 0.083           | 0.213 ± 0.030           |
| Low Theta  | dHPC-iHPC | 0.218 ± 0.024 | 0.252 ± 0.026 | <b>0.771 ± 0.028***</b> | <b>0.693 ± 0.039***</b> | <b>0.689 ± 0.043***</b> | <b>0.652 ± 0.045***</b> | <b>0.714 ± 0.052***</b> | <b>0.374 ± 0.043***</b> | <b>0.266 ± 0.031*</b>   |
|            | dHPC-BLA  | 0.227 ± 0.027 | 0.282 ± 0.030 | <b>0.767 ± 0.028***</b> | <b>0.524 ± 0.044***</b> | <b>0.518 ± 0.038***</b> | 0.366 ± 0.033           | <b>0.328 ± 0.037**</b>  | 0.247 ± 0.029           | <b>0.259 ± 0.037*</b>   |
|            | iHPC-BLA  | 0.339 ± 0.040 | 0.334 ± 0.044 | <b>0.290 ± 0.045***</b> | <b>0.328 ± 0.050**</b>  | 0.415 ± 0.060           | <b>0.320 ± 0.051***</b> | 0.413 ± 0.057           | 0.348 ± 0.039           | 0.424 ± 0.062           |
|            | vHPC-dHPC | 0.291 ± 0.033 | 0.257 ± 0.033 | <b>0.801 ± 0.032***</b> | <b>0.613 ± 0.039**</b>  | 0.519 ± 0.044           | <b>0.591 ± 0.057*</b>   | <b>0.597 ± 0.071*</b>   | 0.331 ± 0.035           | 0.321 ± 0.033           |
|            | vHPC-iHPC | 0.291 ± 0.016 | 0.285 ± 0.044 | <b>0.827 ± 0.042***</b> | 0.482 ± 0.068           | 0.309 ± 0.054           | 0.497 ± 0.061           | <b>0.515 ± 0.061**</b>  | 0.343 ± 0.049           | 0.296 ± 0.023           |
|            | vHPC-BLA  | 0.239 ± 0.025 | 0.273 ± 0.022 | <b>0.788 ± 0.032***</b> | <b>0.527 ± 0.061**</b>  | <b>0.475 ± 0.053***</b> | 0.435 ± 0.061           | 0.382 ± 0.051           | 0.312 ± 0.033           | 0.213 ± 0.024           |
| Beta       | dHPC-iHPC | 0.091 ± 0.013 | 0.102 ± 0.012 | 0.097 ± 0.011           | 0.109 ± 0.012           | <b>0.139 ± 0.017***</b> | <b>0.117 ± 0.015*</b>   | 0.124 ± 0.015           | <b>0.135 ± 0.017***</b> | <b>0.128 ± 0.015***</b> |
|            | dHPC-BLA  | 0.110 ± 0.014 | 0.108 ± 0.015 | 0.118 ± 0.013           | <b>0.131 ± 0.013***</b> | <b>0.125 ± 0.012†</b>   | <b>0.133 ± 0.016***</b> | <b>0.130 ± 0.015*</b>   | <b>0.141 ± 0.018***</b> | <b>0.154 ± 0.014***</b> |
|            | iHPC-BLA  | 0.168 ± 0.012 | 0.164 ± 0.014 | <b>0.419 ± 0.023***</b> | <b>0.433 ± 0.027***</b> | <b>0.343 ± 0.031***</b> | <b>0.246 ± 0.017**</b>  | 0.158 ± 0.019           | 0.169 ± 0.014           | 0.167 ± 0.011           |
|            | vHPC-dHPC | 0.163 ± 0.018 | 0.135 ± 0.028 | 0.147 ± 0.027           | <b>0.127 ± 0.022*</b>   | 0.106 ± 0.016           | 0.159 ± 0.019           | 0.135 ± 0.024           | 0.138 ± 0.025           | 0.115 ± 0.028           |
|            | vHPC-iHPC | 0.111 ± 0.017 | 0.109 ± 0.019 | <b>0.411 ± 0.023***</b> | <b>0.310 ± 0.029***</b> | <b>0.291 ± 0.038***</b> | <b>0.242 ± 0.027*</b>   | <b>0.353 ± 0.034***</b> | 0.097 ± 0.023           | 0.115 ± 0.011           |
|            | vHPC-BLA  | 0.143 ± 0.022 | 0.146 ± 0.015 | <b>0.482 ± 0.018***</b> | <b>0.280 ± 0.026***</b> | <b>0.289 ± 0.041*</b>   | 0.233 ± 0.028           | 0.179 ± 0.030           | 0.177 ± 0.025           | 0.142 ± 0.021           |

Note: Mean ± se (bold: statistical significance in pairwise comparisons to basal period; \*\*\*p<0.001; \*\*p<0.01, \*p<0.05; †: 0.08<p<0.05)
