# Supplementary figures and images for: The Oscillatory Profile Induced by the Anxiogenic Drug FG-7142 in the Amygdala–Hippocampal Network Is Reversed by Infralimbic Deep Brain Stimulation: Relevance for Mood Disorders
Source: MDPI journal article supplement (doi:10.3390/biomedicines9070783), 2021-07-06

# SLOW WAVES

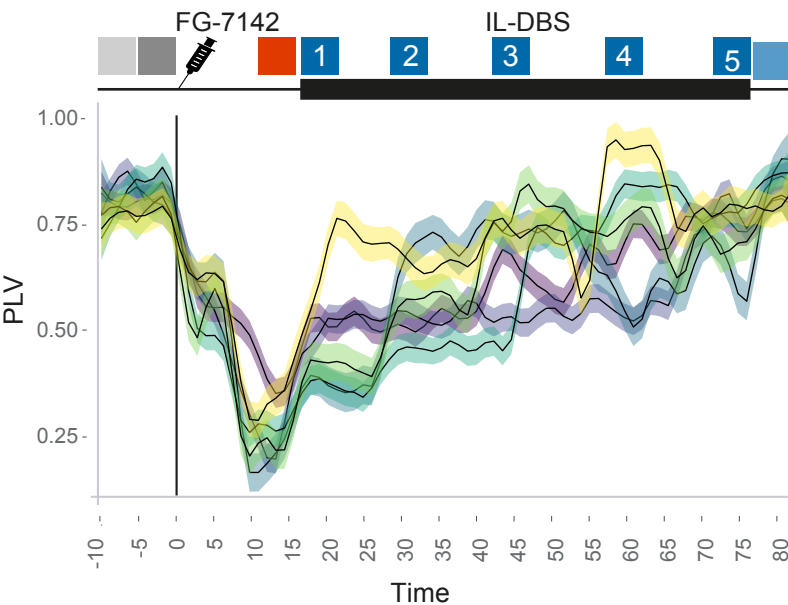

# PLV DELTA

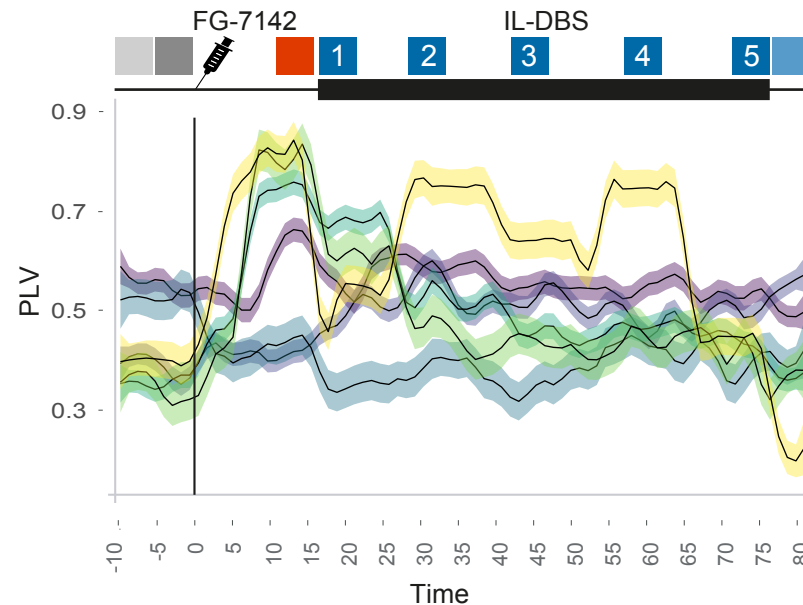

# LOW THETA

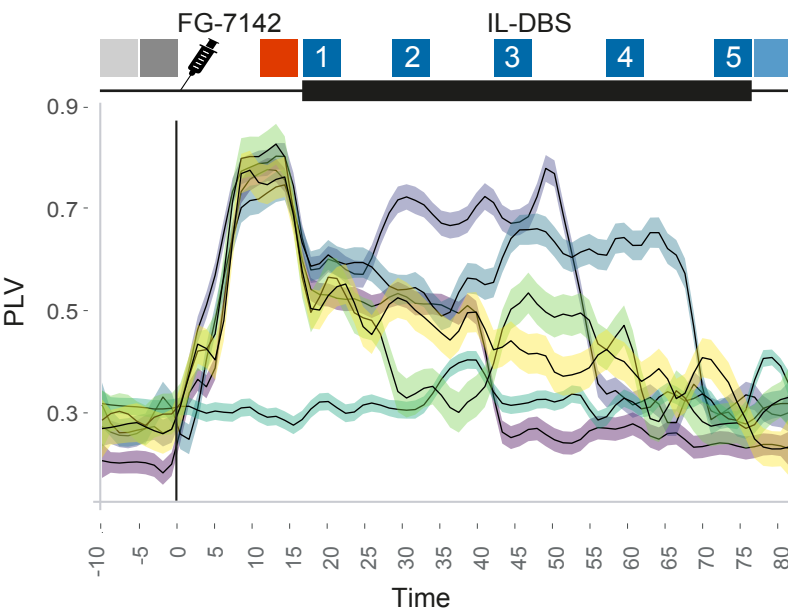

# PLV BETA

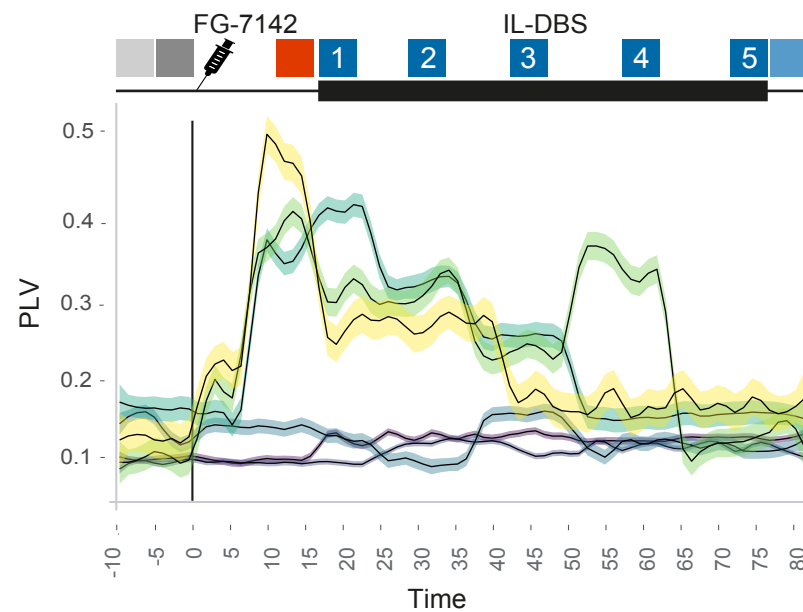

- dHPC-BLA
- dHPC-iHPC
- dHPC-vHPC
- iHPC-BLA
- iHPC-vHPC
- vHPC-BLA

Supplement: s1 [file s1]

# Supplementary Figure S2

## dHPC

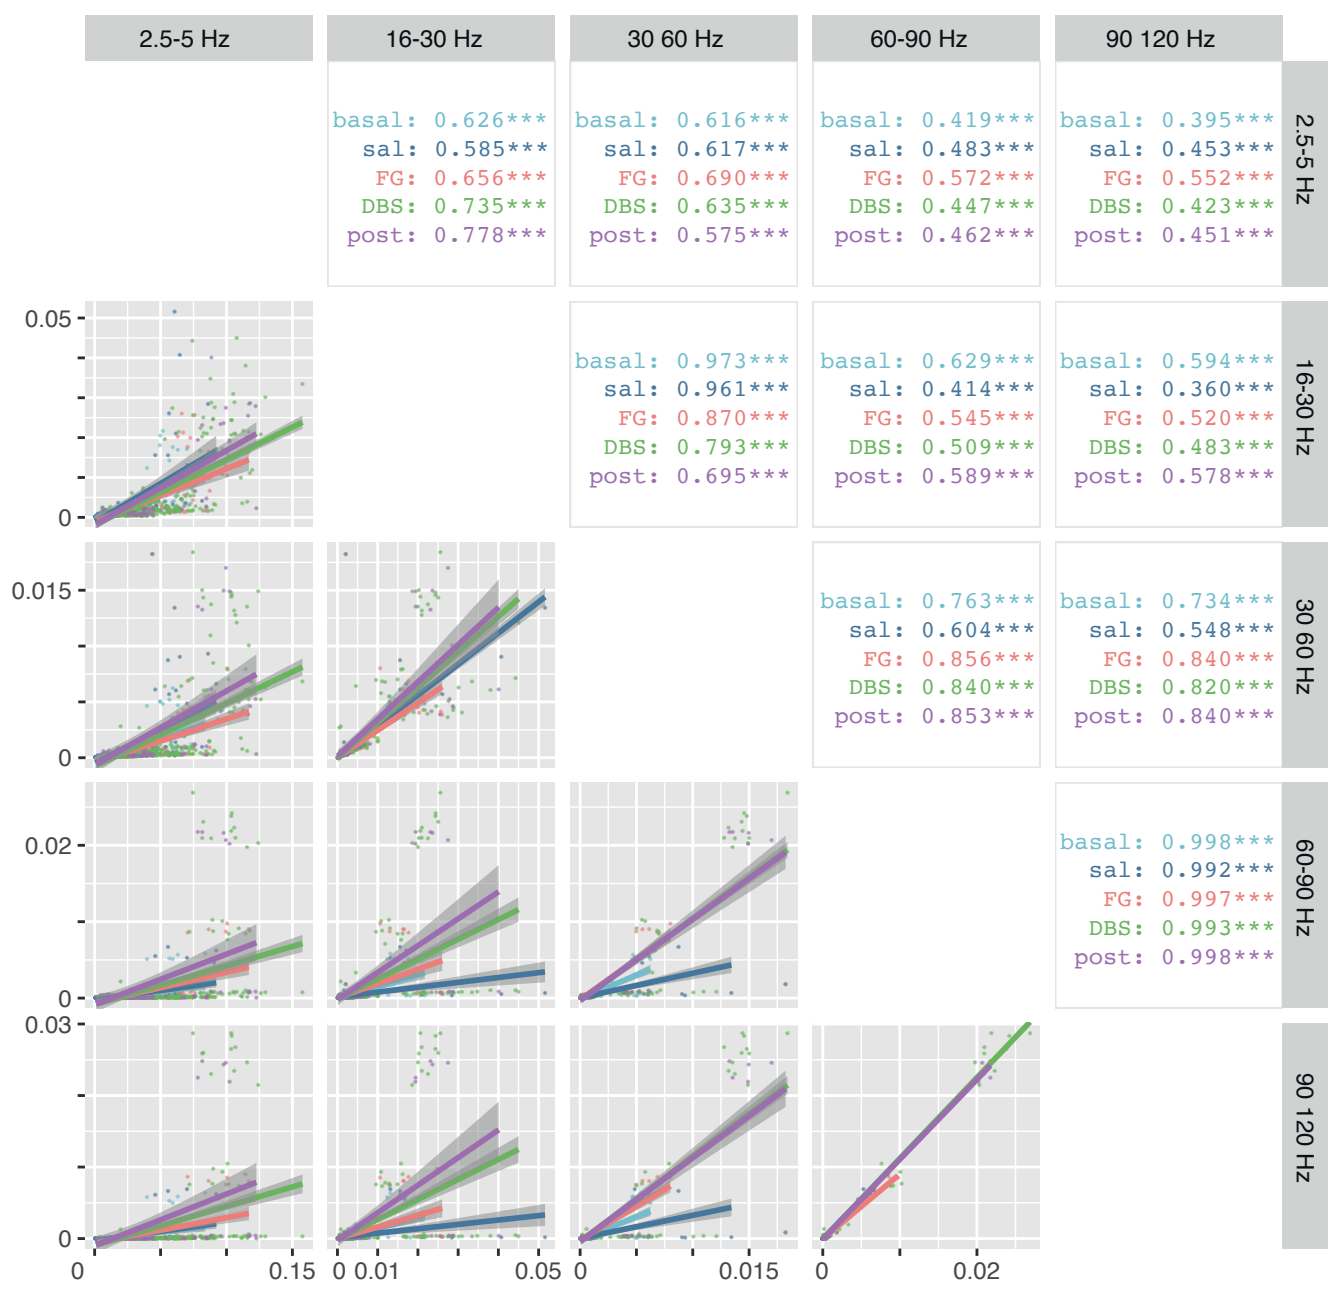

## iHPC

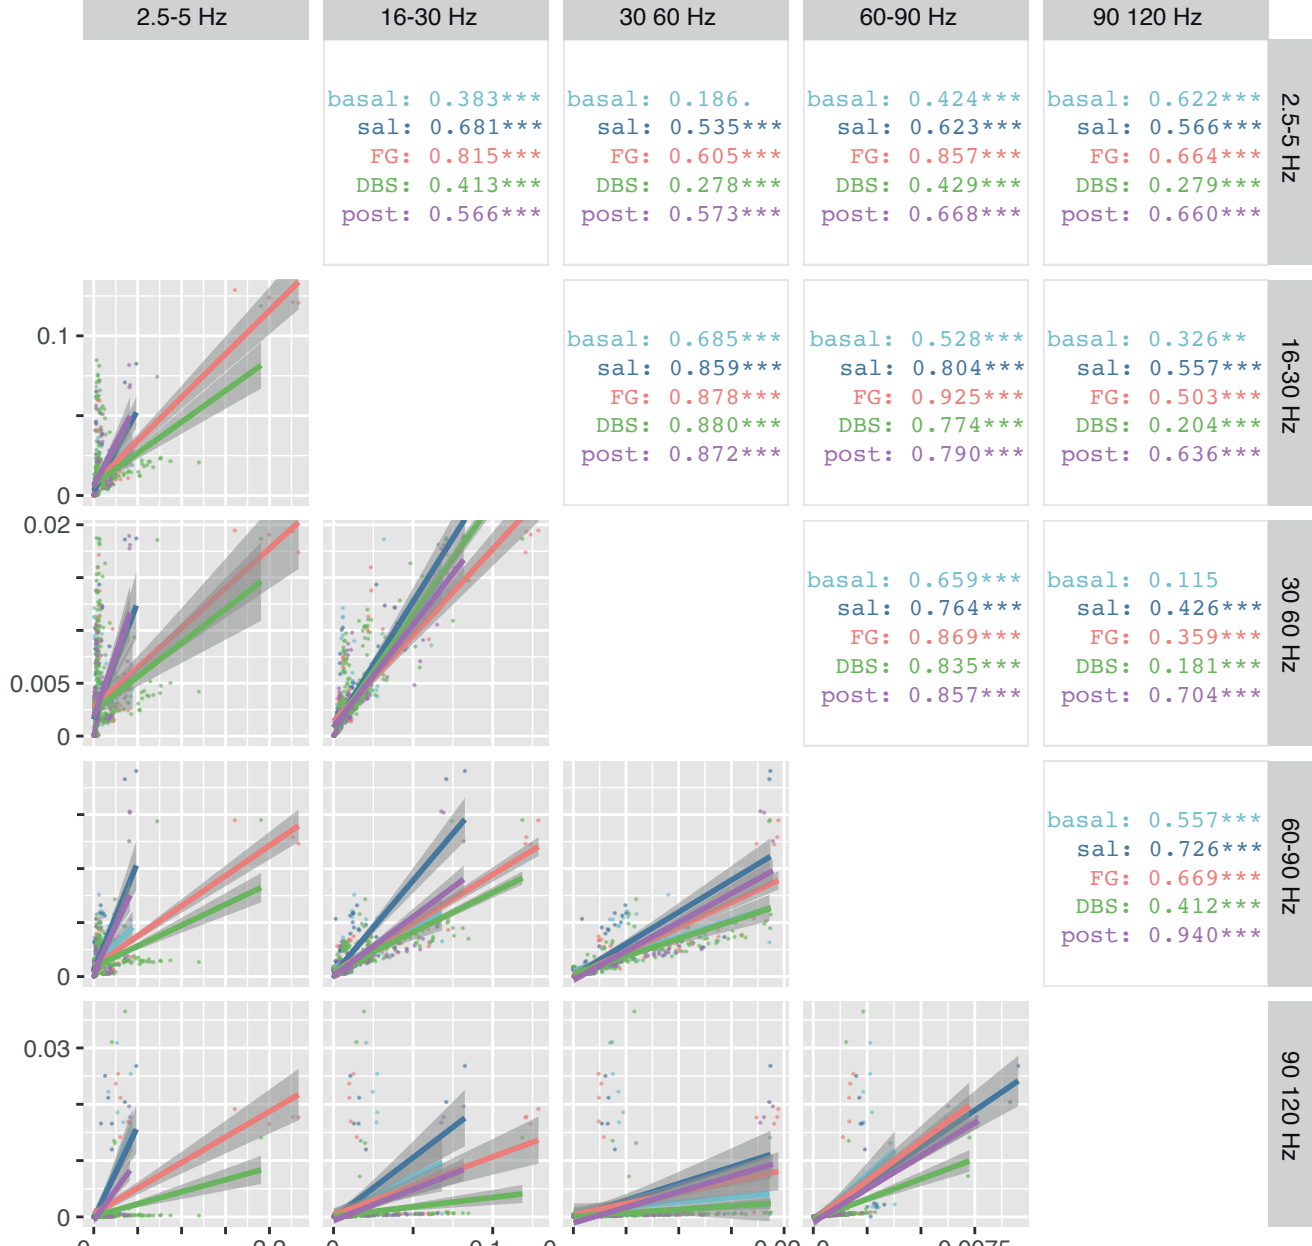

## vHPC

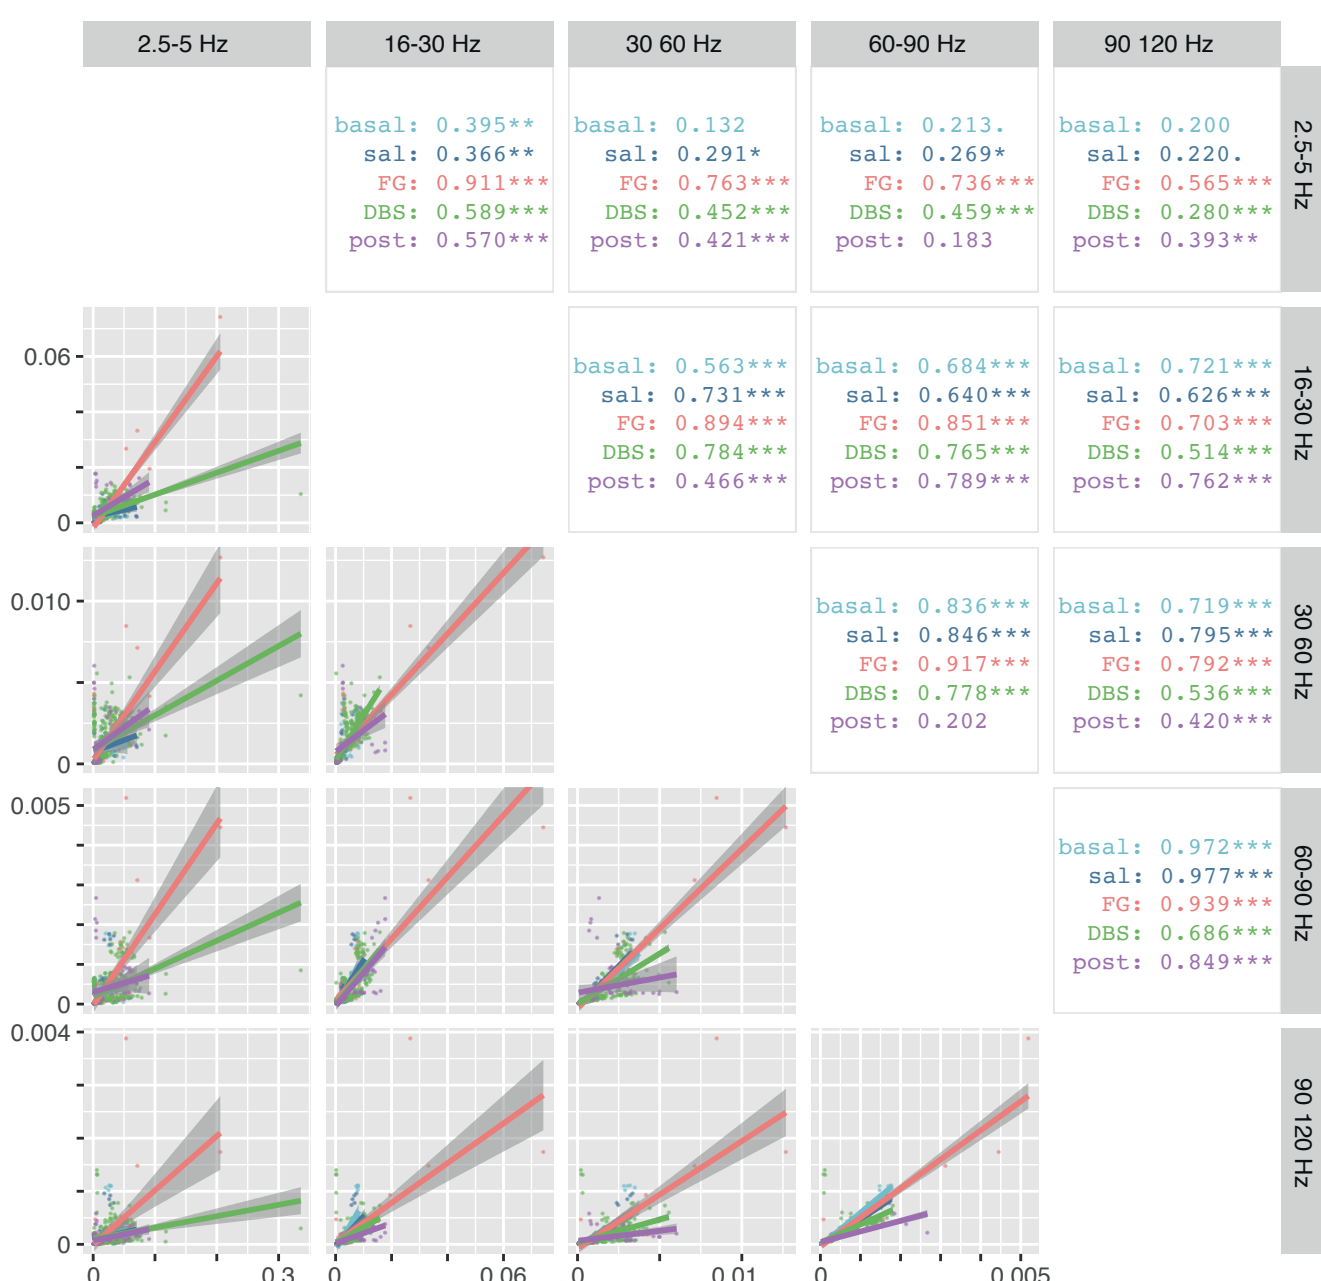

## BLA

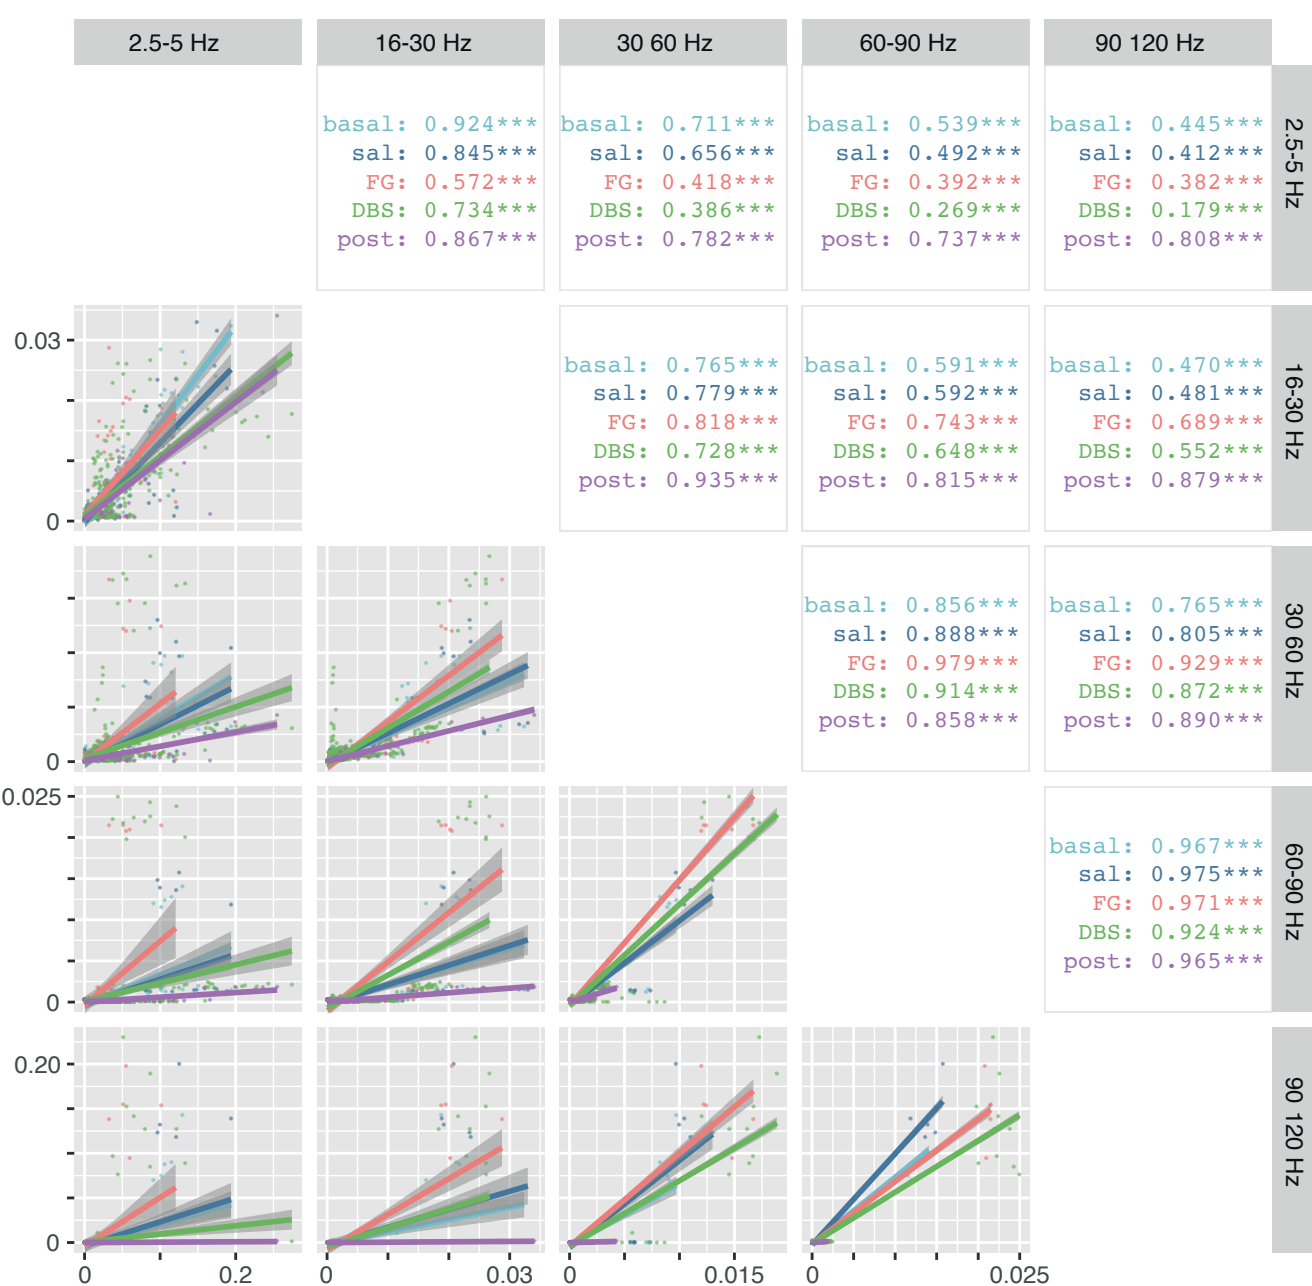

Supplement: s1 [file s1]
